# Supplementary material for: Hydrogen reversibility of LiBH4–MgH2–Al composites
Source: Royal Society of Chemistry journal article supplement (doi:10.1039/c4cp00651h), 2014-01-01
Supplement: c4cp00651h1.pdf [file c4cp00651h1.pdf]

## Supplementary Informations

### Hydrogen reversibility of LiBH<sub>4</sub>-MgH<sub>2</sub>-Al Composites

Bjarne R. S. Hansen<sup>1</sup>, Dorthe B. Ravnsbæk<sup>1,2</sup>, Jørgen Skibsted<sup>3</sup>, Torben R. Jensen<sup>1\*</sup>

<sup>1</sup> Center for Materials Crystallography, Interdisciplinary Nanoscience Center (iNANO), and Department of Chemistry, Aarhus University, Langelandsgade 140, DK-8000 Aarhus C, Denmark

<sup>2</sup> Massachusetts Institute of Technology, Department of Materials Science and Engineering, 77 Massachusetts Avenue, Cambridge, MA 02139, United States of America

<sup>3</sup> Instrument Centre for Solid-State NMR Spectroscopy, Department of Chemistry, and Interdisciplinary Nanoscience Center (iNANO), Aarhus University, Langelandsgade 140, DK-8000 Aarhus C, Denmark

\* Corresponding author: Torben R. Jensen (trj@chem.au.dk)

## Rietveld refinement

Rietveld refinement is performed on selected PXD patterns from *in situ* SR-PXD measurements and presented below in Figure S1 and S2. The extracted data is presented in Table 2.

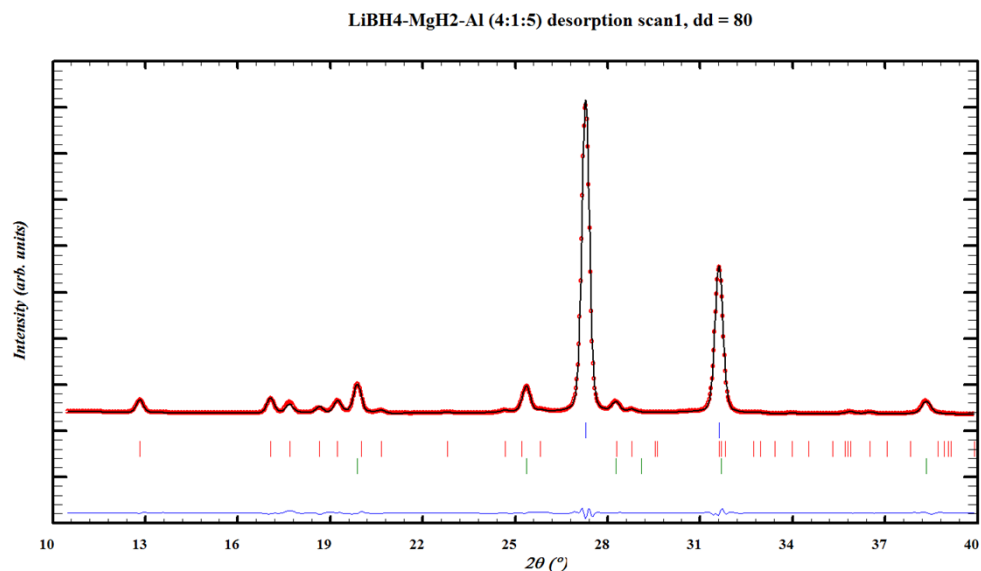

**Figure S1.** Rietveld refinement profile ( $Y_{\text{calc}}$ , upper black line) of SR-PXD data (observed data  $Y_{\text{obs}}$ , red) for LiBH<sub>4</sub>-MgH<sub>2</sub>-Al (4:1:5, S2) measured at *RT before desorption* ( $\lambda = 1.10205 \text{ \AA}$ ). This data is shown in Figure 2. Ticks: Al (upper, blue), *o*-LiBH<sub>4</sub> (middle, red) and MgH<sub>2</sub> (lower, green). The difference profile ( $Y_{\text{obs}} - Y_{\text{calc}}$ ) is shown as the lower (blue) curve. Reliability factors,  $R_{\text{Bragg}}$ , are  $R_{\text{Bragg}}(\textit{o}\text{-LiBH}_4) = 6.37$ ,  $R_{\text{Bragg}}(\text{Al}) = 0.167$  and  $R_{\text{Bragg}}(\text{MgH}_2) = 1.44$ .

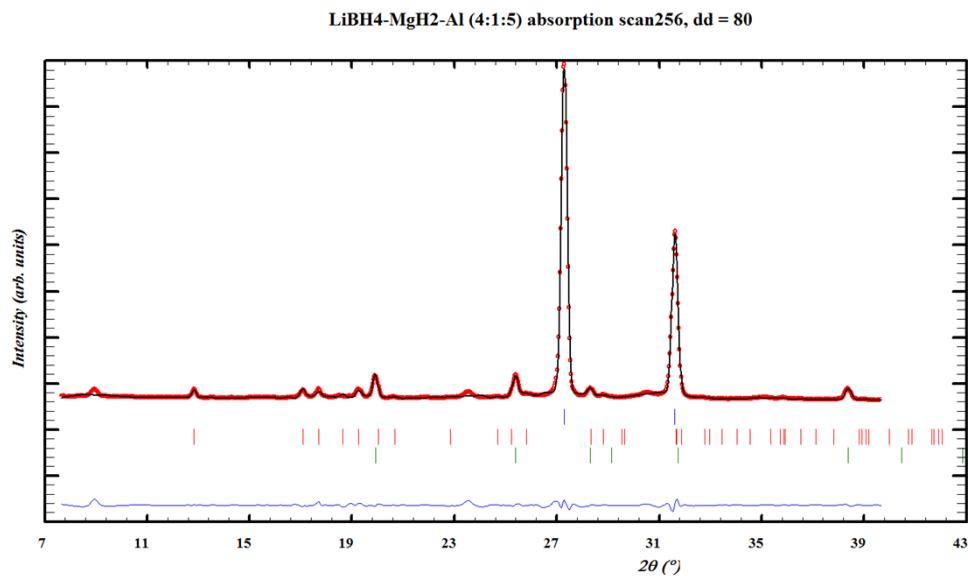

**Figure S2.** Rietveld refinement profile ( $Y_{\text{calc}}$ , upper black line) of SR-PXD data (observed data  $Y_{\text{obs}}$ , red) for LiBH<sub>4</sub>-MgH<sub>2</sub>-Al (4:1:5, **S2**) measured at *RT* after absorption ( $\lambda = 1.10205 \text{ \AA}$ ). This data is shown in Figure 5. Ticks: Al (upper, blue), *o*-LiBH<sub>4</sub> (middle, red) and MgH<sub>2</sub> (lower, green). The difference profile ( $Y_{\text{obs}} - Y_{\text{calc}}$ ) is shown as the lower (blue) curve. Reliability factors,  $R_{\text{Bragg}}$ , are  $R_{\text{Bragg}}(o\text{-LiBH}_4) = 26.1$ ,  $R_{\text{Bragg}}(\text{Al}) = 0.514$  and  $R_{\text{Bragg}}(\text{MgH}_2) = 4.54$ .

**Table S1.** Crystallographic data for compounds observed in the LiBH<sub>4</sub>-MgH<sub>2</sub>-Al system.

| Compound                                           | Space group    | <i>a</i> (Å) | <i>b</i> (Å) | <i>c</i> (Å) | Reference |
|----------------------------------------------------|----------------|--------------|--------------|--------------|-----------|
| <i>o</i> -LiBH <sub>4</sub>                        | <i>Pnma</i>    | 7.179        | 4.437        | 6.803        | 1         |
| <i>h</i> -LiBH <sub>4</sub>                        | <i>P63mc</i>   | 4.276        | ---          | 6.948        | 1         |
| LiH                                                | <i>Fm-3m</i>   | 4.083        | ---          | ---          | 2         |
| Al                                                 | <i>Fm-3m</i>   | 4.049        | ---          | ---          | 3         |
| Li <sub>0.3</sub> Mg <sub>0.7</sub>                | <i>Im-3m</i>   | 3.517        | ---          | ---          | 4         |
| Mg <sub>17</sub> Al <sub>12</sub>                  | <i>I4-3m</i>   | 10.5438      | ---          | ---          | 5         |
| Mg                                                 | <i>P63/mmc</i> | 3.2094       | ---          | 5.2103       | 6         |
| Mg <sub>0.9</sub> Al <sub>0.1</sub>                | <i>P63/mmc</i> | 3.1692       | ---          | 5.1581       | 7         |
| Mg <sub>0.5</sub> Al <sub>0.5</sub> B <sub>2</sub> | <i>P6/mmm</i>  | 3.047        | ---          | 3.366        | 8         |
| MgO                                                | <i>Fm-3m</i>   | 4.217        | ---          | ---          | 9         |
| LiAl                                               | <i>Fd-3m</i>   | 6.376        | ---          | ---          | 10        |
| WC                                                 | <i>P6-m2</i>   | 2.907        | ---          | 2.837        | 11        |

**Table S2.** Reflections observed for unknown compounds denoted 1, 2 and 3

| Unknown 1* |               |               | Unknown 2** |               |               | Unknown 3*** |               |               |
|------------|---------------|---------------|-------------|---------------|---------------|--------------|---------------|---------------|
| 2θ (°)     | d-spacing (Å) | Intensity (%) | 2θ (°)      | d-spacing (Å) | Intensity (%) | 2θ (°)       | d-spacing (Å) | Intensity (%) |
| 21.22      | 4.18          | 100           | 21.12       | 4.20          | 100           | 8.91         | 9.91          | 88            |
| 34.97      | 2.56          | 70            | 35.84       | 2.50          | 80            | 23.51        | 3.78          | 100           |

\*Observed in LiBH<sub>4</sub>-MgH<sub>2</sub>-Al (411, **S1**) absorption, scan 32-38 (*T* = 275-340 °C)

\*\*Observed in LiBH<sub>4</sub>-MgH<sub>2</sub>-Al (411, **S1**) absorption, scan 125-182 (*T* = 400-245 °C)

\*\*\* Observed in *in situ* SR-PXD desorption and absorption of **S2** and in samples of **S1** and **S2** after three hydrogen release and uptake cycles. Data obtained *after* absorption measurement of **S2** at *RT*.

## References

1. J.-P. Soulié, G. Renaudin, R. Černý, and K. Yvon, *J Alloys Comp*, 2002, **346**, 200–205.
2. E. Staritzky, *Anal Chem*, 1956, **28**, 1055.
3. E. R. Jette and F. Foote, *J Chem Phys*, 1935, **3**, 605–616.
4. F. H. Herbstein and B. L. Averbach, *Acta Metall.*, 1956, **4**, 407–413.
5. P. Schobinger-Papamantellos and P. Fischer, *Naturwissenschaften*, 1970, **57**, 128–129.
6. H. E. Swanson, United States, and National Bureau of Standards, *Standard x-ray diffraction powder patterns*, U.S. Dept. of Commerce, National Bureau of Standards : For sale by the Supt. of Docs., U.S. G.P.O., Washington, DC, 1953.
7. R. S. Busk, *Trans. Am. Inst. Min. Metall. Pet. Eng.*, 1950, **1950**, 1460–1464.
8. N. V. Vekshina, T. K. Voevodskaya, L. Y. Markovskii, and Y. D. Kondrashev, *Zhurnal Prikl. Khimii*, 1971, **1971**, 970–974.
9. R. E. Cohen and Z. Gong, *Phys. Rev. B*, 1994, **1994**, 12301–12311.
10. E. D. Levine and E. J. Rapperport, *Trans Met. Soc AIME*, 1963, **227**, 1204–1208.
11. I. Garaycochea and H. Cid-Dresdner, *Acta Cryst*, 1961, **14**, 200–201.
